# Supplementary material
Source: PubMed Central journal article supplement (PMC3459487)
Supplement: 11_357_Kulp.suppl.pdf [file 11_357_Kulp.suppl.pdf]

Supplemental Data

Hyperglycemia Exacerbates Burn-Induced Liver Inflammation via Noncanonical Nuclear Factor- $\kappa$ B Pathway Activation

Gabriela A Kulp,<sup>1,2</sup> Ronald G Tilton,<sup>1,3,4</sup> David N Herndon,<sup>5</sup> and Marc G Jeschke<sup>6</sup>

Online address: <http://www.molmed.org>

The Feinstein Institute for Medical Research North Shore LIJ

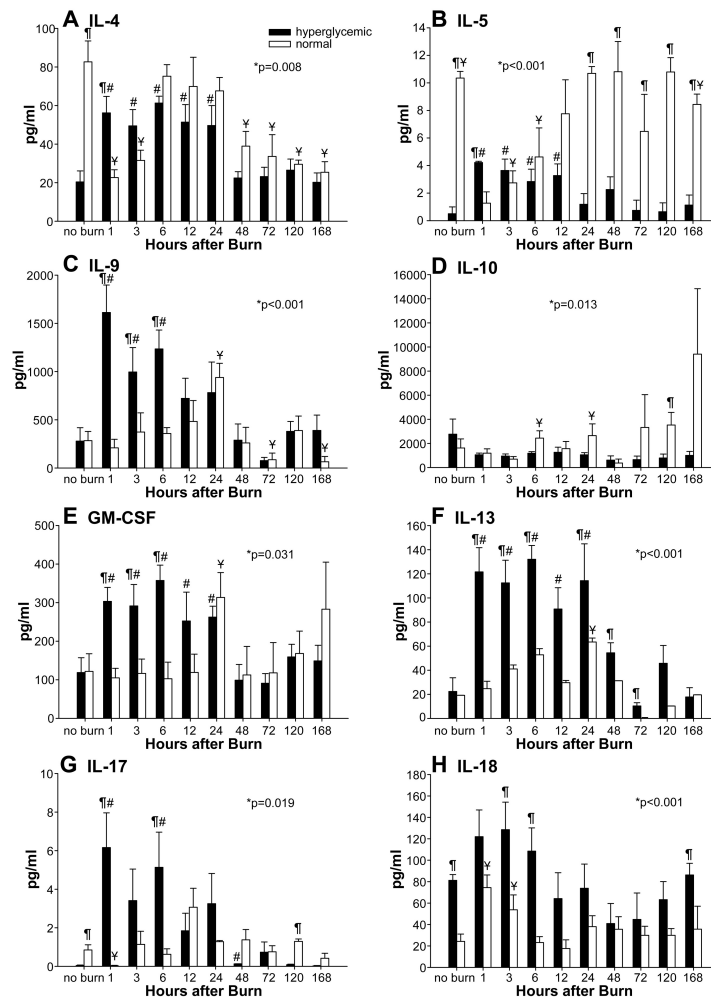

**Supplementary Figure S1.** Additional liver tissue cytokine levels. Cytokine levels were measured in cytosolic extracts of liver harvested at multiple times post burn injury using a 24-plex assay. While most of the 24 cytokines measured showed significant changes between the 2 groups over time (two-way ANOVA), we report results for 8 representative cytokines. Significant differences between various time points and baseline values within groups (one-way ANOVA with post-hoc correction) and between groups at individual time points (Student *t* test; unequal variance was used where appropriate) are shown. \* p<0.05 between groups over time by two-way ANOVA. # p<0.05 versus no burn (hyperglycemic group) by one-way ANOVA with Bonferroni correction. ¥ p<0.05 versus no burn (normal group) by one-way ANOVA with Bonferroni correction. ¶ p<0.001 between hyperglycemic and normal at individual time points after burn by Student *t* test.
